# Supplementary material
Source: MDPI journal article supplement (https://www.mdpi.com/2073-4352/11/8/975)
Supplement: s1 [file s1]

# Transfer of a Rational Crystal Contact Engineering Strategy between Diverse Alcohol Dehydrogenases

Brigitte Walla <sup>1</sup>, Daniel Bischoff <sup>1</sup>, Robert Janowski <sup>2</sup>, Nikolas von den Eichen <sup>1</sup>, Dierk Niessing <sup>2,3</sup> and Dirk Weuster-Botz <sup>1,\*</sup>

<sup>1</sup> Institute of Biochemical Engineering, Technical University of Munich, Boltzmannstraße 15, 85748 Garching, Germany; brigitte.walla@tum.de (B.W.), daniel.bischoff@tum.de (D.B.), nikolas.eichen@tum.de (N.v.d.E.)

<sup>2</sup> Institute of Structural Biology, Helmholtz Zentrum München, Ingolstädter Landstraße 1, 85764 Neuherberg, Germany; robert.janowski@helmholtz-muenchen.de (R.J.); niessing@helmholtz-muenchen.de (D.N.)

<sup>3</sup> Institute of Pharmaceutical Biotechnology, Ulm University, James Franck Ring N27, 89081 Ulm, Germany

\* Correspondence: dirk.weuster-botz@tum.de (D.W.-B.)

```

LkADH    1  TDRLKGKVAIVTGGTLGIGLAIADKFVEEGAKVVITGRHADVGEKAASIGGTDVIRFVQ
LbADH    1  SNRLDGKVAIITGGTLGIGLAIATKFVEEGAKVMITGRHSDVGEKAASVGTDPQIQFFQ
          **  *****  *****  *****  *****  *****  *  *  *  *  *

LkADH    61 HDASDEAGWTKLFDTTEEAFGPVTTVVNNAGIAVSKSVEDTTTEEWRKLLSVNLDGVFFG
LbADH    61 HDSSDEAGWTKLFDATEKAFGPVSTLVNNAGIAVNKSVEETTAEWRKLLAVNLDGVFFG
          **  ***  *****  **  *****  *  *****  *****  *****  *****

LkADH    121 TRLGIRMKNGKLGASIIINMSSIEGFVGDP TLGAYNASKGAVRIMSKSAALDCALKDYDV
LbADH    121 TRLGIRMKNGKLGASIIINMSSIEGFVGDP SLGAYNASKGAVRIMSKSAALDCALKDYDV
          *****  *****  *****  *****  *****  *****  *****

LkADH    181 RVNTVHPGYIKTEPLVDDLEGAEEMMSORTKTPMGHIGEPNDIAWICVYLASDESKFATGA
LbADH    181 RVNTVHPGYIKTEPLVDDLPGAEEAMSORTKTPMGHIGEPNDIAYICVYLASNESKFATGS
          *****  *****  *****  *****  *****  *****  *****

LkADH    241 EFVVDGGYTAQ
LbADH    241 EFVVDGGYTAQ
          *****

```

**Figure S1.** Sequence alignment of *LkADH* and *LbADH* wild type with an amino acid sequence homology of 88.5 %. The optimal global alignment was generated with the Needleman-Wunsch algorithm (EMBOSS, output format: pair, matrix: BLOSUM62) [1]. Identical amino acids are marked with an asterisk. Crystal contacts (distance between amino acids < 4 Å) are marked for *LkADH* (cyan) and *LbADH* (green). The positions selected for mutations, T102 and Q126, are underlined. RMSD of the crystal contacts are listed in Supplementary Table S2.

**Table S1.** Data collection and refinement statistics of X-ray diffraction experiments of *LkADH* wild type and mutant Q126K crystals (values in parentheses are for highest resolution shell).

| <i>LkADH</i> Variant                 | Wild Type            | Q126K                |
|--------------------------------------|----------------------|----------------------|
| <b>Data Collection</b>               |                      |                      |
| PDB ID                               | 7P36                 | 7P7Y                 |
| Beamline                             | SLS Beamline X06DA   | SLS Beamline X06DA   |
| Wavelength, Å                        | 1.000                | 1.000                |
| Space group                          | I 2 2 2              | I 2 2 2              |
| Cell dimensions, Å                   | 55.87, 79.97, 114.59 | 55.84, 80.04, 114.93 |
| No. of molecules per asymmetric unit | 1                    | 1                    |
| Resolution, Å                        | 50–1.14 (1.21–1.14)  | 50–1.25 (1.32–1.25)  |
| <i>I</i> /σ( <i>I</i> )              | 71.4 (26.9)          | 49.61 (14.32)        |
| CC (1/2)                             | 100.0 (99.8)         | 100 (99.3)           |
| Completeness, %                      | 100.0 (99.8)         | 99.2 (95.3)          |
| Redundancy                           | 12.8 (11.9)          | 11.62 (6.43)         |

|                                       |               |               |
|---------------------------------------|---------------|---------------|
| R <sub>meas</sub> , %                 | 2.3 (8.3)     | 3.3 (10.9)    |
| <b>Refinement</b>                     |               |               |
| Resolution, Å                         | 1.14          | 1.25          |
| No. unique reflections                | 93486 (6458)  | 70930 (4734)  |
| R <sub>work</sub> / R <sub>free</sub> | 0.093 / 0.107 | 0.088 / 0.132 |
| No. atoms                             |               |               |
| Protein                               | 1865          | 1865          |
| Water                                 | 387           | 344           |
| Other                                 | 23            | 16            |
| B-factors                             |               |               |
| Overall                               | 7.37          | 9.1           |
| Protein main chain                    | 6.39          | 7.95          |
| Protein side chain                    | 8.24          | 10.27         |
| R.m.s. deviations                     |               |               |
| Bond lengths, Å                       | 0.012         | 0.012         |
| Bond angles, °                        | 1.82          | 1.68          |
| Ramachandran plot                     |               |               |
| Most favored, %                       | 98            | 98            |
| Additional allowed, %                 | 2             | 2             |

**Table S2.** RMSD<sub>side chain</sub> of crystal contacts present in both *LkADH* and *LbADH* wild type and calculated after side chain and backbone alignment of one tetramer. Crystal contacts were defined by a distance < 4 Å between amino acid residues of neighboring tetramers. The contact RMSD<sub>side chain</sub> was then calculated by alignment of those amino acid residues forming a contact with PyMOL (v.2.3.; Schroedinger). Therefore, a smaller contact RMSD value indicates, that the corresponding crystal contacts in *LbADH* and *LkADH* wild type crystals are locally more similar.

| Amino acid residue | Contacts                      | Contact RMSD <sub>side chain</sub> , Å |
|--------------------|-------------------------------|----------------------------------------|
| H39                | D74, E77, R127                | 1.26                                   |
| V42                | D41, T70                      | 0.95                                   |
| K45                | E66                           | 1.26                                   |
| D54                | T52, D54                      | 4.89                                   |
| K71                | D197                          | 1.58                                   |
| T102               | K48                           | 1.25                                   |
| Q126               | A40/S40, D41, T70, L123, R127 | 1.13                                   |
| E203               | R208                          | 2.59                                   |

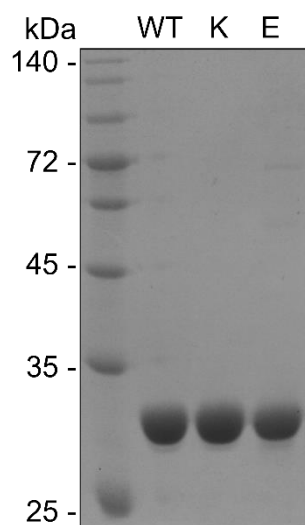

**Figure S2.** Illustration of protein purity analysis using SDS-PAGE of *LkADH* wild type (WT) and mutants Q126K (K) and T102E (E). The proteins purified by IMAC were loaded onto a 12.5% SDS gel (2.5 µg protein) under reducing conditions. Bands between 25–35 kDa correspond to *LkADH* monomers.

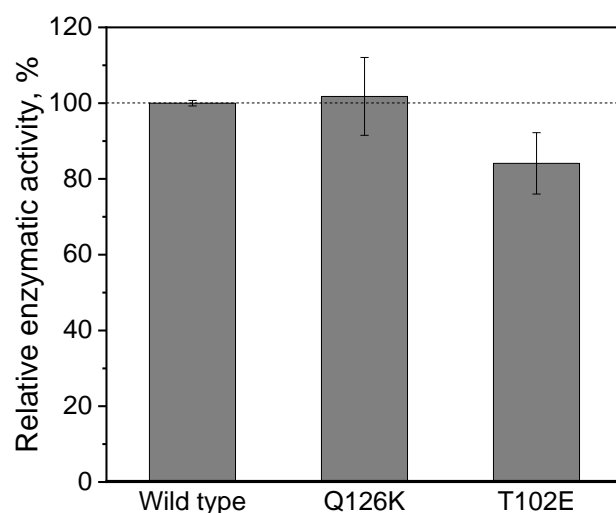

**Figure S3.** Maximum relative enzymatic activity of *LkADH* mutants Q126K and T102E compared to *LkADH* wild type. Purified protein solutions of *LkADH* variants were adjusted to 6 mg L<sup>-1</sup>. Enzymatic activity was measured for 10 min at 340 nm (45 °C) with addition of 180 µL buffer (20 mM HEPES, pH 7.0; 1 mM MgCl<sub>2</sub>) containing 0.5 mM NADPH and 10 mM acetophenone to a final volume of 200 µL (n = 3).

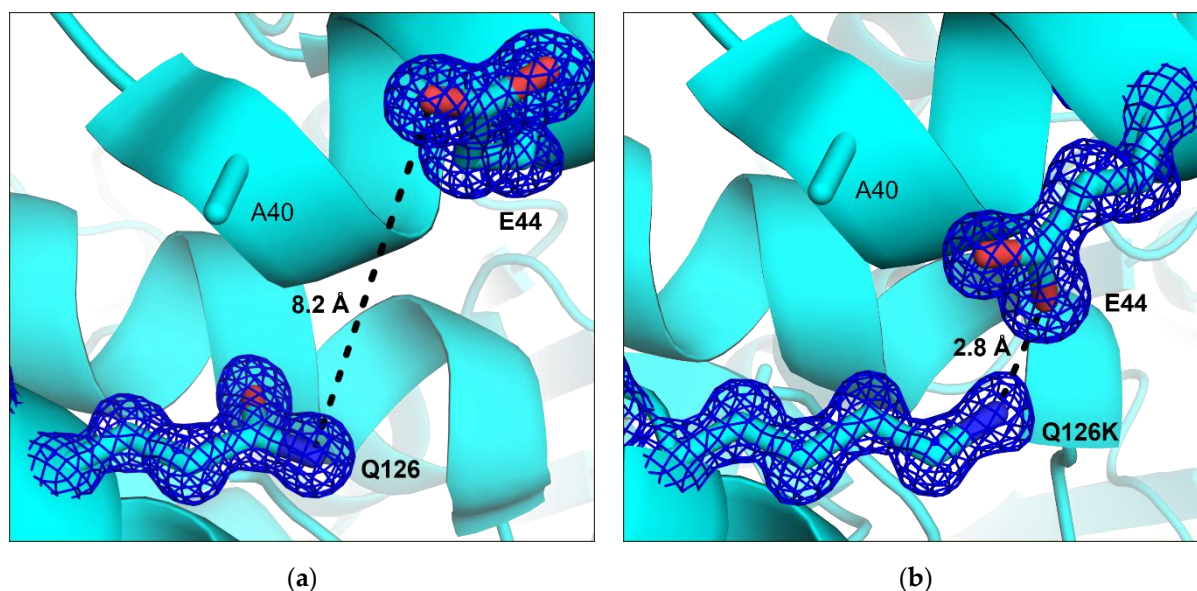

**Figure S4.** Electron density map (blue) of *LkADH* crystal contact at position (a) Q126 and (b) Q126K with well-defined electron density of the lysine and glutamic acid side chain. The map represents the structure factor amplitude difference  $2F_o - F_c$  with a contour level of 1.0  $\sigma$  (calculated with *REFMAC* [2]).

## References

1. Madeira, F., Park, Y.M., Lee, J., Buso, N., Gur, T., Madhusoodanan, N., Lopez, R., The EMBL-EBI search and sequence analysis tools APIs in 2019. *Nucleic Acids Res.* **2019**, 47, W636–W641.
2. Murshudov, G.N., Vagin, A.A., and Dodson, E.J., Refinement of Macromolecular Structures by the Maximum-Likelihood Method. *Acta Crystallogr., Sect. D: Biol. Crystallogr.* **1997**. 53, 240–255.
